# Supplementary material
Source: publisher figshare collection journal article supplement (https://tandf.figshare.com/ndownloader/files/16642580)
Supplement: Supplementary file 1 [file 16642580]

## Supplemental Material

### 1. Calculation of Subjective Unconsciousness using ROC measures

#### 1.1: ROC calculations and experimental method

There was no precedence for the calculation of non-parametric discrimination performance using ROC criteria for subjective adjustments (Kingdom & Prins, 2010; Prins, 2016). In consultation with on-topic colleagues and further development of existing methods (Tsikandilakis, Chapman & Peirce, 2018), ROC-adjustments were made to the duration of presentation (13.89 or 20.83 or 27.78 or 34.72 or 41.67 ms) for which hits produced the closest – corrected for multiple available forced-choices – score to .167 when false alarms were designated as false positives for the particular stimulus type in the implemented duration (13.89 or 20.83 or 27.78 or 34.72 or 41.67 ms) after dividing the false alarm rate by the number of available stimulus categories that could confer the possibility for false alarms. The blurs were also treated as potential instances for false alarms. The implementation of the duration of the blur stimuli was performed also using subjective criteria for .167 ( $n_{13.89} = 59$ ;  $n_{20.83} = 18$ ;  $M. = .174$ ,  $S.E. = .007$ ;  $B = .34$ ). Instances of equal performance between two or more thresholds were not reported for ROC or hit-rate adjustments.

## 1.2: Perfect Chance Level Performance for A adapted for Multiple Choice Assessment

For available experimental durations 13.89 or 20.83 or 27.78 or 34.72 or 41.67 ms and for Angry adjusted duration “x”, Fearful adjusted duration “y”, happy adjusted duration “z”, sad adjusted duration “w”, neutral adjusted duration “q” and blur adjusted duration “i”, perfect chance-level performance ( $A = .167$ ):

|                           |             |             |             |             |             |                                               |
|---------------------------|-------------|-------------|-------------|-------------|-------------|-----------------------------------------------|
| <b>Presented Stimulus</b> | Angry (x)                                     |
| <b>Responded</b>          | Angry       | Fearful     | Happy       | Sad         | Neutral     | Blur                                          |
| <b>Presented Stimulus</b> | Fearful (y)                                   |
| <b>Responded</b>          | Angry       | Fearful     | Happy       | Sad         | Neutral     | Blur                                          |
| <b>Presented Stimulus</b> | Happy (z)                                     |
| <b>Responded</b>          | Angry       | Fearful     | Happy       | Sad         | Neutral     | Blur                                          |
| <b>Presented Stimulus</b> | Sad (w)                                       |
| <b>Responded</b>          | Angry       | Fearful     | Happy       | Sad         | Neutral     | Blur                                          |
| <b>Presented Stimulus</b> | Neutral (q)                                   |
| <b>Responded</b>          | Angry       | Fearful     | Happy       | Sad         | Neutral     | Blur                                          |
| <b>Presented Stimulus</b> | Blur (i)    | Blur $K = \frac{S(blurs)}{n(emotion\ types)}$ |
| <b>Responded</b>          | Angry       | Fearful     | Happy       | Sad         | Neutral     | Blur/K                                        |

Tab.2: Perfect chance-level performance

## . Supplemental Material 2: Session Analysis

### 2.1: Frequentist Analysis

|                |                | Sum of Squares | df | Mean Square | F     | Sig. |
|----------------|----------------|----------------|----|-------------|-------|------|
| Fearful_SCR    | Between Groups | .000           | 1  | .000        | .201  | .656 |
|                | Within Groups  | .010           | 75 | .000        |       |      |
|                | Total          | .010           | 76 |             |       |      |
| Angry_SCR      | Between Groups | .000           | 1  | .000        | .324  | .571 |
|                | Within Groups  | .005           | 75 | .000        |       |      |
|                | Total          | .005           | 76 |             |       |      |
| Happiness_SCR  | Between Groups | .000           | 1  | .000        | .077  | .783 |
|                | Within Groups  | .003           | 75 | .000        |       |      |
|                | Total          | .003           | 76 |             |       |      |
| Sadness_SCR    | Between Groups | .000           | 1  | .000        | 1.894 | .173 |
|                | Within Groups  | .001           | 75 | .000        |       |      |
|                | Total          | .001           | 76 |             |       |      |
| Neutrality_SCR | Between Groups | .000           | 1  | .000        | 2.778 | .100 |
|                | Within Groups  | .001           | 75 | .000        |       |      |
|                | Total          | .001           | 76 |             |       |      |
| Fear_HR        | Between Groups | .013           | 1  | .013        | 1.371 | .245 |
|                | Within Groups  | .694           | 75 | .009        |       |      |
|                | Total          | .707           | 76 |             |       |      |
| Anger_HR       | Between Groups | .014           | 1  | .014        | 1.329 | .253 |
|                | Within Groups  | .798           | 75 | .011        |       |      |
|                | Total          | .812           | 76 |             |       |      |
| Happiness_HR   | Between Groups | .018           | 1  | .018        | 3.469 | .066 |
|                | Within Groups  | .391           | 75 | .005        |       |      |
|                | Total          | .409           | 76 |             |       |      |
| Sadness_HR     | Between Groups | .011           | 1  | .011        | 1.617 | .207 |
|                | Within Groups  | .528           | 75 | .007        |       |      |
|                | Total          | .539           | 76 |             |       |      |

### 2.2: Bayesian Analysis

Full Bayesian pairwise comparisons are included in a dedicated section in 3.1 to 3.7 using matrix statistical tables for each assessment.

### 3. Bayesian Analysis

#### 3.1: SCR responses for ROC adjustments

A Bayesian analysis with uncorrected degrees of freedom was run using the Dienes calculator. The intervals were defined at - .01 and .01. The results for B can be seen in the confusion matrix below:

|         | Angry | Happy | Sad | Neutral |
|---------|-------|-------|-----|---------|
| Fearful | .27   | .11   | .55 | 1.31    |
| Angry   |       | .12   | .47 | 1.12    |
| Happy   |       |       | .36 | .97     |

#### 3.2: Heart-rate responses for ROC adjustments

A Bayesian analysis with uncorrected degrees of freedom was run using the Dienes calculator. The intervals were defined at - 1 and 1. The results for B can be seen in the confusion matrix below:

|         | Angry | Happy | Sad | Neutral |
|---------|-------|-------|-----|---------|
| Fearful | .5    | .12   | .17 | .92     |
| Angry   |       | .15   | .19 | .74     |
| Happy   |       |       | .21 | .97     |

#### 3.3: Valence responses for ROC adjustments

A Bayesian analysis with uncorrected degrees of freedom was run using the Dienes calculator. The intervals were defined at - 1 and 1. The results for B can be seen in the confusion matrix below:

|         | Angry | Happy | Sad | Neutral |
|---------|-------|-------|-----|---------|
| Fearful | .23   | .47   | .51 | .49     |
| Angry   |       | .36   | .49 | .41     |
| Happy   |       |       | .   | .21     |

#### 3.4: Arousal responses for ROC adjustments

A Bayesian analysis with uncorrected degrees of freedom was run using the Dienes calculator. The intervals were defined at - 1 and 1. The results for B can be seen in the confusion matrix below:

|         | Angry | Happy | Sad | Neutral |
|---------|-------|-------|-----|---------|
| Fearful | .62   | .74   | .66 | .99     |
| Angry   |       | .72   | .66 | .98     |
| Happy   |       |       | .67 | .99     |

### 3.5 Facial-Emotional Responses

A Bayesian analysis with uncorrected degrees of freedom was run using the Dienes calculator. The intervals were defined at - .1 and .1. The results for B can be seen in the confusion matrix below:

|         | Angry | Sad |
|---------|-------|-----|
| Fearful | .02   | .01 |
| Angry   |       | .01 |

### 3.6: Force Pressure Responses for ROC Adjustments

A single participant was excluded from the analysis due to excessive movement artefacts. See raw data at <https://osf.io/3v4uh/> A Bayesian analysis with uncorrected degrees of freedom was run using the Dienes calculator. The intervals were defined at - .1 and .1. The results for B can be seen in the confusion matrix below:

|         | Angry | Happy | Sad | Neutral |
|---------|-------|-------|-----|---------|
| Fearful | .02   | .07   | .05 | .14     |
| Angry   |       | .04   | .09 | .11     |
| Happy   |       |       | .09 | .08     |

### 3.7: RDR Responses for Hit-Rate and ROC Adjustments

A single participant was excluded from the analysis due to excessive movement artefacts. See raw data at <https://osf.io/3v4uh/> A Bayesian analysis with uncorrected degrees of freedom was run using the Dienes calculator. The intervals were defined at - .1 and .1. The results for B can be seen in the confusion matrix below:

#### Hit-Rate Adjustments:

|         | Angry | Happy | Sad | Neutral |
|---------|-------|-------|-----|---------|
| Fearful | .73   | .71   | .95 | .96     |
| Angry   |       | .79   | .91 | .97     |
| Happy   |       |       | .92 | .96     |

#### ROC Adjustments:

|         | Angry | Happy | Sad | Neutral |
|---------|-------|-------|-----|---------|
| Fearful | .03   | .08   | .09 | .19     |
| Angry   |       | .09   | .09 | .13     |
| Happy   |       |       | .11 | .12     |

## Supplemental Material 4: Pairwise Comparisons

### 4.1: Frequentist Analysis

#### Descriptive Statistics

|                | Mean  | Std. Deviation | N  |
|----------------|-------|----------------|----|
| SCRFEARHITS    | .0922 | .01059         | 77 |
| SCRANGRYHITS   | .0566 | .00968         | 77 |
| SCRHAPPYHITS   | .0555 | .01165         | 77 |
| SCRADHITS      | .0174 | .00894         | 77 |
| SCRNEUTRALHITS | .0166 | .03110         | 77 |

#### Pairwise Comparisons

Measure: MEASURE\_1

| (I) SCR_Hits | (J) SCR_Hits | Mean Difference (I-J) | Std. Error | Sig. <sup>b</sup> | 95% Confidence Interval for Difference <sup>b</sup> |             |
|--------------|--------------|-----------------------|------------|-------------------|-----------------------------------------------------|-------------|
|              |              |                       |            |                   | Lower Bound                                         | Upper Bound |
| 1            | 2            | .036*                 | .002       | .000              | .031                                                | .040        |
|              | 3            | .037*                 | .002       | .000              | .032                                                | .042        |
|              | 4            | .075*                 | .001       | .000              | .070                                                | .079        |
|              | 5            | .076*                 | .004       | .000              | .065                                                | .086        |
| 2            | 1            | -.036*                | .002       | .000              | -.040                                               | -.031       |
|              | 3            | .001                  | .002       | 1.000             | -.004                                               | .006        |
|              | 4            | .039*                 | .002       | .000              | .035                                                | .044        |
|              | 5            | .040*                 | .004       | .000              | .030                                                | .050        |
| 3            | 1            | -.037*                | .002       | .000              | -.042                                               | -.032       |
|              | 2            | -.001                 | .002       | 1.000             | -.006                                               | .004        |
|              | 4            | .038*                 | .002       | .000              | .033                                                | .043        |
|              | 5            | .039*                 | .004       | .000              | .028                                                | .049        |
| 4            | 1            | -.075*                | .001       | .000              | -.079                                               | -.070       |
|              | 2            | -.039*                | .002       | .000              | -.044                                               | -.035       |
|              | 3            | -.038*                | .002       | .000              | -.043                                               | -.033       |
|              | 5            | .001                  | .004       | 1.000             | -.010                                               | .012        |
| 5            | 1            | -.076*                | .004       | .000              | -.086                                               | -.065       |
|              | 2            | -.040*                | .004       | .000              | -.050                                               | -.030       |
|              | 3            | -.039*                | .004       | .000              | -.049                                               | -.028       |
|              | 4            | -.001                 | .004       | 1.000             | -.012                                               | .010        |

### Descriptive Statistics

|                | Mean  | Std. Deviation | N  |
|----------------|-------|----------------|----|
| SCRFEARMISS    | .0306 | .00848         | 77 |
| SCRANGRYMISS   | .0297 | .00873         | 77 |
| SCRHAPPYMISS   | .0257 | .01105         | 77 |
| SCRADMINISS    | .0186 | .00914         | 77 |
| SCRNEUTRALMISS | .0113 | .00817         | 77 |

### Pairwise Comparisons

Measure: MEASURE\_1

| (I) SCR_Hits | (J) SCR_Hits | Mean<br>Difference (I-J) | Std. Error | Sig. <sup>b</sup> | 95% Confidence Interval for<br>Difference <sup>b</sup> |             |
|--------------|--------------|--------------------------|------------|-------------------|--------------------------------------------------------|-------------|
|              |              |                          |            |                   | Lower Bound                                            | Upper Bound |
| 1            | 2            | .001                     | .001       | 1.000             | -.003                                                  | .005        |
|              | 3            | .005*                    | .002       | .035              | .000                                                   | .010        |
|              | 4            | .012*                    | .001       | .000              | .008                                                   | .016        |
|              | 5            | .019*                    | .001       | .000              | .016                                                   | .023        |
| 2            | 1            | -.001                    | .001       | 1.000             | -.005                                                  | .003        |
|              | 3            | .004                     | .002       | .209              | -.001                                                  | .009        |
|              | 4            | .011*                    | .001       | .000              | .007                                                   | .015        |
|              | 5            | .018*                    | .001       | .000              | .014                                                   | .023        |
| 3            | 1            | -.005*                   | .002       | .035              | -.010                                                  | .000        |
|              | 2            | -.004                    | .002       | .209              | -.009                                                  | .001        |
|              | 4            | .007*                    | .002       | .001              | .002                                                   | .012        |
|              | 5            | .014*                    | .002       | .000              | .010                                                   | .019        |
| 4            | 1            | -.012*                   | .001       | .000              | -.016                                                  | -.008       |
|              | 2            | -.011*                   | .001       | .000              | -.015                                                  | -.007       |
|              | 3            | -.007*                   | .002       | .001              | -.012                                                  | -.002       |
|              | 5            | .007*                    | .001       | .000              | .003                                                   | .011        |
| 5            | 1            | -.019*                   | .001       | .000              | -.023                                                  | -.016       |
|              | 2            | -.018*                   | .001       | .000              | -.023                                                  | -.014       |
|              | 3            | -.014*                   | .002       | .000              | -.019                                                  | -.010       |
|              | 4            | -.007*                   | .001       | .000              | -.011                                                  | -.003       |

## 4.2: Bayesian Analysis

Full Bayesian pairwise comparisons are included in a dedicated section in 3.1 to 3.7 using matrix statistical tables for each assessment.

## 5. Bonferonni Corrected Comparisons for Linear Trend Analysis

### 5.1: SPSS Output

| Bonferroni      |            |            |          |        |       |        |        |
|-----------------|------------|------------|----------|--------|-------|--------|--------|
| Fear_Trend_SCR  | Unsure     | Possibly   | -.01747* | .00355 | .000  | -.0261 | -.0089 |
|                 |            | Definetely | -.03317* | .00355 | .000  | -.0418 | -.0246 |
|                 | Possibly   | Unsure     | .01747*  | .00355 | .000  | .0089  | .0261  |
|                 |            | Definetely | -.01570* | .00353 | .000  | -.0243 | -.0071 |
|                 | Definetely | Unsure     | .03317*  | .00355 | .000  | .0246  | .0418  |
|                 |            | Possibly   | .01570*  | .00353 | .000  | .0071  | .0243  |
| Fear_Trend_HR   | Unsure     | Possibly   | -.55793* | .03775 | .000  | -.6495 | -.4663 |
|                 |            | Definetely | -.64363* | .03775 | .000  | -.7352 | -.5520 |
|                 | Possibly   | Unsure     | .55793*  | .03775 | .000  | .4663  | .6495  |
|                 |            | Definetely | -.08570  | .03752 | .072  | -.1768 | .0054  |
|                 | Definetely | Unsure     | .64363*  | .03775 | .000  | .5520  | .7352  |
|                 |            | Possibly   | .08570   | .03752 | .072  | -.0054 | .1768  |
| Angry_Trend_SCR | Unsure     | Possibly   | -.00006  | .00180 | 1.000 | -.0044 | .0043  |
|                 |            | Definetely | -.01817* | .00180 | .000  | -.0225 | -.0138 |
|                 | Possibly   | Unsure     | .00006   | .00180 | 1.000 | -.0043 | .0044  |
|                 |            | Definetely | -.01811* | .00178 | .000  | -.0224 | -.0138 |
|                 | Definetely | Unsure     | .01817*  | .00180 | .000  | .0138  | .0225  |
|                 |            | Possibly   | .01811*  | .00178 | .000  | .0138  | .0224  |
| Angry_Trend_HR  | Unsure     | Possibly   | -.04026  | .05897 | 1.000 | -.1834 | .1029  |
|                 |            | Definetely | -.55367* | .05897 | .000  | -.6968 | -.4105 |
|                 | Possibly   | Unsure     | .04026   | .05897 | 1.000 | -.1029 | .1834  |
|                 |            | Definetely | -.51341* | .05827 | .000  | -.6548 | -.3720 |
|                 | Definetely | Unsure     | .55367*  | .05897 | .000  | .4105  | .6968  |
|                 |            | Possibly   | .51341*  | .05827 | .000  | .3720  | .6548  |
| Happy_Trend_SCR | Unsure     | Possibly   | -.00081  | .00375 | 1.000 | -.0099 | .0083  |
|                 |            | Definetely | -.00982* | .00373 | .029  | -.0189 | -.0008 |
|                 | Possibly   | Unsure     | .00081   | .00375 | 1.000 | -.0083 | .0099  |
|                 |            | Definetely | -.00900  | .00375 | .054  | -.0181 | .0001  |
|                 | Definetely | Unsure     | .00982*  | .00373 | .029  | .0008  | .0189  |
|                 |            | Possibly   | .00900   | .00375 | .054  | -.0001 | .0181  |



|                |            |            |          |        |      |        |        |
|----------------|------------|------------|----------|--------|------|--------|--------|
| Happy_Trend_HR | Unsure     | Possibly   | -.36103* | .05049 | .000 | -.4836 | -.2385 |
|                |            | Definetely | -.52951* | .05019 | .000 | -.6513 | -.4077 |
|                | Possibly   | Unsure     | .36103*  | .05049 | .000 | .2385  | .4836  |
|                |            | Definetely | -.16847* | .05049 | .003 | -.2910 | -.0459 |
|                | Definetely | Unsure     | .52951*  | .05019 | .000 | .4077  | .6513  |
|                |            | Possibly   | .16847*  | .05049 | .003 | .0459  | .2910  |

## 5.2: Bayesian Analysis

Full Bayesian pairwise comparisons are included in a dedicated section in 3.1 to 3.7 using matrix statistical tables for each assessment. Further supplementary material and analysis can also be found at <https://osf.io/3v4uh/>
